# Supplementary material for: Zwitterionic dithiocarboxylates derived from N-heterocyclic carbenes: coordination to gold surfaces
Source: Royal Society of Chemistry journal article supplement (doi:10.1039/c2dt11976e), 2012-01-01
Supplement: c2dt11976e.pdf [file c2dt11976e.pdf]

## Electronic Supplementary Information

### **Zwitterionic dithiocarboxylates derived from N-heterocyclic carbenes: coordination to gold surfaces**

Ulrich Siemeling,<sup>\*a,c</sup> Henry Memczak,<sup>a,c</sup> Clemens Bruhn,<sup>a</sup> Florian Vogel,<sup>b,c</sup> Frank Träger,<sup>b,c</sup>  
Joe E. Baio<sup>d</sup> and Tobias Weidner<sup>d</sup>

<sup>a</sup>*Institute of Chemistry, University of Kassel, Heinrich-Plett-Str. 40, 34132 Kassel, Germany.*

*E-mail: siemeling@uni-kassel.de*

<sup>b</sup>*Institute of Physics, University of Kassel, Heinrich-Plett-Str. 40, 34132 Kassel, Germany*

<sup>c</sup>*Center for Interdisciplinary Nanostructure Science and Technology, University of Kassel,  
Heinrich-Plett-Str. 40, 34132 Kassel, Germany*

<sup>d</sup>*National ESCA and Surface Analysis Center for Biomedical Problems (NESAC/BIO),  
Departments of Bioengineering and Chemical Engineering, University of Washington,  
Seattle, Washington 98195, USA*

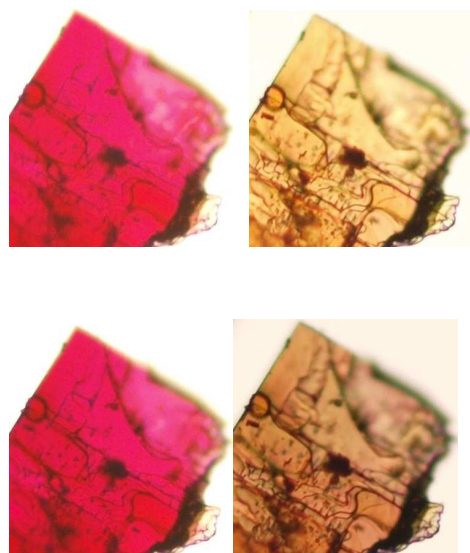

**Fig. S1** Pleochroitic behaviour of a single-crystal of  $3^+-CS_2^-$  in linearly polarised light. The crystal is turned by  $0^\circ$  (top left),  $90^\circ$  (top right),  $180^\circ$  (bottom left) and  $270^\circ$  (bottom right).
